# Supplementary material
Source: publisher figshare collection journal article supplement (https://gsajournals.figshare.com/ndownloader/files/35146057)
Supplement: Supplementary file 1 [file 35146057]

## Sheet: IP-MS RLBPs
Table S1. Proteins found to interact with R-loops
Sheet 1 - IP-MS studies						Remaining proteins common between any two studies
Cristini et al. 2018	Wang et al. 2018 (Attracted to hybrids)	Wu et al. 2021			Common between all 3 studies	Cristini x Wang	Cristini x Wu	Wang x Wu		IP-MS Training dataset			Proteins which are attracted to only hybrids and not dsDNA (Wang et al. 2018)
BRIX1	ABCE1	GNL3			GNL3	YBX1	EIF6	RPS11		GNL3
CCDC137	ABCF1	HNRNPH1			HNRNPH1	G3BP1	BRIX1	RPS17		HNRNPH1
NOP2	ACAT1	MOV10			MATR3	EIF2AK2	CCDC59	RPL10A		MATR3
H1FX	ACLY	MATR3			MOV10	RBM15	IMP4	RPL26		MOV10
DDX18	ACP1	DDX5			DDX5	EEF2	HNRNPD	NUP155		DDX5		References
RSL1D1	AGPS	U2AF2			U2AF2	IGF2BP3	YWHAG	NUP98		U2AF2		Cristini et al. 2018		https://pubmed.ncbi.nlm.nih.gov/29742442/
PPAN	AHCY	NOC4L			NOC4L	PRPF4	RRP8	NIFK		NOC4L		Wang et al. 2018		https://pubmed.ncbi.nlm.nih.gov/30108179/
DDX21	AIM1	NAT10			NAT10	LYAR	RCL1	RPS5		NAT10		Wu et al. 2021		https://pubmed.ncbi.nlm.nih.gov/34478875/
NOP56	ALDH18A1	SFPQ			SFPQ	SRP14	WDR46	RPL7A		SFPQ
MKI67IP	ALYREF	ILF2			ILF2	SRPK1	RRP7A	RPS6		ILF2
UTP18	ANKHD1	TBL3			TBL3	G3BP2	SRSF7	RPS10		TBL3
MRTO4	ANKRD17	RBM14			RBM14	FAM98A	NOP56	KPNA2		RBM14
DDX39B	AP2A1	PRPF8			PRPF8	FRG1	MPHOSPH10	BCLAF1		PRPF8
MYBBP1A	AP2B1	HNRNPM			HNRNPM	EIF4A1	HNRNPA2B1	RPL5		HNRNPM
RRS1	AQR	SRSF1			SRSF1	RBM4	NOL12	NUP160		SRSF1
FBL	ARHGEF2	NPM1			NPM1	SKIV2L2	UTP18	RPS3A		NPM1
RALY	ASCC3	XRN2			XRN2	ABCF1	SNRPA1	RPL12		XRN2
RPF2	ATAD3A	FUS			FUS	SMARCA4	SNRNP70	RPS12		FUS
RBMX	ATP2A2	PWP2			PWP2	SON	RALY	RPS4X		PWP2
HNRNPR	ATP5C1	NOP2			NOP2	CCT2	RSL24D1	RPS3		NOP2
GPATCH4	ATP5L	DDX18			DDX18	PABPC4	DDX27	RPL3		DDX18
MAK16	ATXN2L	HSP90AB1			HSP90AB1	MYH9	HNRNPF	POLDIP3		HSP90AB1
RRP15	BCLAF1	NCL			NCL	DDX6	TRA2B	CHD4		NCL
FTSJ3	C14orf166	NOL6			NOL6	NKRF	GTPBP4	RPS19		NOL6
EIF4A3	CAD	DHX15			DHX15	LARS	RRP1	RPL9		DHX15
DHX9	CAPRIN1	FBL			FBL	CCT8	SRSF10	RPL4		FBL
PHIP	CARM1	NOP58			NOP58	USP10	WDR74	RPL13		NOP58
NHP2L1	CCAR2	PWP1			PWP1	SND1	SLC25A5	PPP1CC		PWP1
NSA2	CCNT1	ALYREF			ALYREF	GNB2L1	YWHAE	RPS2		ALYREF
LYAR	CCT2	DDX17			DDX17	DHX30	SRSF6	RPL7		DDX17
RBM34	CCT3	PDCD11			PDCD11	PLEC	BOP1	RPL13A		PDCD11
WDR12	CCT4	HNRNPA0			HNRNPA0	CCT3	DDX3Y	RPS7		HNRNPA0
MOV10	CCT5	NONO			NONO	EMG1	PRPF19	NUP133		NONO
HNRNPAB	CCT7	NPM3			NPM3	DNAJA3	FCF1	PNO1		NPM3
AHCTF1	CCT8	PABPC1			PABPC1	STAU1	CCDC137	RPL23A		PABPC1
PABPC4	CDC5L	MCM5			MCM5	POP1	BAZ2A	RPS25		MCM5
NOP16	CDC73	CDC5L			CDC5L	PRPF3	WDR43	RPL17		CDC5L
DDX54	CHD4	U2AF1			U2AF1	PA2G4	HNRNPAB	KHDRBS1		U2AF1
GAR1	CHERP	UTP14A			UTP14A	RTCB	TOP2A	GAPDH		UTP14A
HNRNPCL1	CLINT1	DKC1			DKC1	RBBP6	SYNCRIP	RPS14		DKC1
HNRNPC	CLTC	WDR3			WDR3	ZC3HAV1	TRA2A	RPS24		WDR3
LLPH	COPA	ILF3			ILF3	DDX1	WDR75	RPL24		ILF3
WDR43	COPB1	DDX3X			DDX3X	MCM3	STRBP	DIMT1		DDX3X
SNRPD1	COPB2	MYBBP1A			MYBBP1A	ZC3H11A	EFTUD2	CSNK2A1		MYBBP1A
DDX3X	CPSF7	PTBP1			PTBP1	CCT4	PPP1CB	RPS9		PTBP1
DDX3Y	CRYZ	IGF2BP1			IGF2BP1	MKI67	KRR1	RPS15		IGF2BP1
RRP7A	CS	LBR			LBR	TCP1	UTP6			LBR
DDX5	CSDE1	DHX9			DHX9	LARP1	RRP9			DHX9
ELAVL1	CSNK1A1	SNRPD2			SNRPD2	EIF3D	HSPA8			SNRPD2
RPF1	CSNK2A1	RPS11				SNRPD1	NGDN			YBX1
GNL2	CSNK2A2	RPS17				DDX23	DCAF13			G3BP1
RBM4B	CTPS1	RPL10A				ZFR	MAK16			EIF2AK2
RBM4	DAP3	RPL26				SART3	DDX54			RBM15
RRP1B	DAZAP1	NUP155				WDR36	TARDBP			EEF2
KM-PA-2	DDX1	NUP98				TSR1	DDX21			IGF2BP3
BOP1	DDX17	NIFK				PHGDH	NOC3L			PRPF4
HIST1H1B	DDX18	RPS5				PLRG1	NSA2			LYAR
KRR1	DDX23	RPL7A				PRKDC	SURF6			SRP14
SURF6	DDX3X	RPS6				HNRNPUL1	DDX24			SRPK1
EIF2AK2	DDX49	RPS10				SNRNP200	RRP12			G3BP2
HNRNPH3	DDX5	KPNA2				TAF15	HNRNPUL2			FAM98A
NKRF	DDX58	BCLAF1				C14orf166	SRSF2			FRG1
ILF3	DDX6	RPL5				STRAP	DNTTIP2			EIF4A1
ZFR	DECR1	NUP160				ZC3H15	SNRPE			RBM4
STAU2	DHX15	RPS3A				SUPT16H	NOL7			SKIV2L2
ALYREF	DHX29	RPL12				DHX36	NVL			ABCF1
CCDC86	DHX30	RPS12				TCOF1	NHP2			SMARCA4
DDX56	DHX36	RPS4X				CLTC	CENPV			SON
SNRPN	DHX37	RPS3				UPF1	RBMX			CCT2
SNRPB	DHX38	RPL3				SNW1	LLPH			PABPC4
HNRNPM	DHX9	POLDIP3				HEATR1	MRTO4			MYH9
CCT8	DIMT1	CHD4				FXR1	CBX3			DDX6
H2AFY	DIS3	RPS19				RAB7A	PCBP1			NKRF
BMS1	DIS3L	RPL9					SMARCA5			LARS
SYNCRIP	DKC1	RPL4					VIM			CCT8
UTP15	DNAJA2	RPL13					RBM8A			USP10
UTP14A	DNAJA3	PPP1CC					HNRNPA3			SND1
EFTUD2	EEF2	RPS2					ELAVL1			GNB2L1
PWP1	EIF2A	RPL7					EBNA1BP2			DHX30
NCBP1	EIF2AK2	RPL13A					SNRPD3			PLEC
ILF2	EIF2C2	RPS7					DDX52			CCT3
HNRNPK	EIF3A	NUP133					NOP16			EMG1
hCG_2044799	EIF3C	PNO1					RBM39			DNAJA3
HNRNPUL2	EIF3D	RPL23A					IMP3			STAU1
MAGOHB	EIF3L	RPS25					HNRNPK			POP1
MAGOH	EIF3S9	RPL17					PCBP2			PRPF3
ERH	EIF4A1	KHDRBS1					RRS1			PA2G4
RCL1	EIF4G1	GAPDH					NOL11			RTCB
SRP72	EIF4G2	RPS14					CEBPZ			RBBP6
WHSC1	EL52	RPS24					ISG20L2			ZC3HAV1
HNRPDL	EMG1	RPL24					RPF1			DDX1
DDX31	EWSR1	DIMT1					SNRNP40			MCM3
WDR46	EXOSC10	CSNK2A1					PPIA			ZC3H11A
LBR	EXOSC2	RPS9					HNRNPH2			CCT4
PDCD11	EXOSC3	RPS15					KPNB1			MKI67
DHX15	EXOSC4	EIF6					AATF			TCP1
NLE1	EXOSC6	BRIX1					FTSJ3			LARP1
ZNF326	EXOSC9	CCDC59					SRSF5			EIF3D
SAFB2	FAM120A	IMP4					ERH			SNRPD1
CTCF	FAM62A	HNRNPD					RRP1B			DDX23
UPF1	FAM98A	YWHAG					RRP15			ZFR
FXR1	FAM98B	RRP8					RSL1D1			SART3
HNRNPC	FARSLA	RCL1					UTP23			WDR36
IMP3	FASN	WDR46					HNRNPL			TSR1
SNRPD2	FBL	RRP7A					KRI1			PHGDH
RBM8A	FLII	SRSF7					HNRNPU			PLRG1
WDR75	FRG1	NOP56					SRSF3			PRKDC
CENPV	FUBP1	MPHOSPH10					DDX56			HNRNPUL1
UTP11L	FUS	HNRNPA2B1					RBM28			SNRNP200
SNRPE	FXR1	NOL12					HNRNPA1			TAF15
C11orf48	G3BP1	UTP18					CTCF			C14orf166
USP36	G3BP2	SNRPA1					NOL10			STRAP
DKC1	GAPDH	SNRNP70					UTP15			ZC3H15
PGAM5	GART	RALY					SRSF4			SUPT16H
MEPCE	GFPT1	RSL24D1					RBMXL1			DHX36
HP1BP3	GNB2L1	DDX27					VDAC2			TCOF1
MPHOSPH10	GNL3	HNRNPF					GAR1			CLTC
TNFAIP2	GOLGA2	TRA2B					RPF2			UPF1
EIF6	HADHB	GTPBP4					HNRNPC			SNW1
SAFB	hCG_1994130	RRP1					GNL2			HEATR1
C7orf50	hCG_2032701	SRSF10					PES1			FXR1
NOP58	hCG_27698	WDR74					PPAN			RAB7A
UTP23	hCG_30204	SLC25A5					CHTOP			EIF6
PRPF19	hCG_31253	YWHAE					CDCA8			BRIX1
HNRNPH1	HDLBP	SRSF6								CCDC59
NOL6	HEATR1	BOP1								IMP4
HNRNPH2	HNRNPA0	DDX3Y								HNRNPD
GRWD1	HNRNPH1	PRPF19								YWHAG
HNRNPU	HNRNPM	FCF1								RRP8
WDR46	HNRNPUL1	CCDC137								RCL1
HIST1H4A	HNRPF	BAZ2A								WDR46
YBX1	HSD17B12	WDR43								RRP7A
SNRNP200	HSD17B4	HNRNPAB								SRSF7
GLTSCR2	HSP90AB1	TOP2A								NOP56
PABPC1	HSPA14	SYNCRIP								MPHOSPH10
SNRPD3	HSPH1	TRA2A								HNRNPA2B1
CIRH1A	HUWE1	WDR75								NOL12
SNRPA1	HYOU1	STRBP								UTP18
HNRNPA1L2	IGF2BP1	EFTUD2								SNRPA1
HNRNPA1	IGF2BP3	PPP1CB								SNRNP70
H1F0	ILF2	KRR1								RALY
XRN2	ILF3	UTP6								RSL24D1
TBL3	IPO9	RRP9								DDX27
NONO	JTV1	HSPA8								HNRNPF
RBM15	KHDRBS1	NGDN								TRA2B
HNRNPUL1	KIF5B	DCAF13								GTPBP4
RBMXL1	KPNA2	MAK16								RRP1
FCF1	LARP1	DDX54								SRSF10
HIST1H1A	LARP4B	TARDBP								WDR74
HIST1H1D	LARS	DDX21								SLC25A5
HIST1H1C	LBR	NOC3L								YWHAE
YTHDC1	LRPPRC	NSA2								SRSF6
KNOP1	LRRFIP1	SURF6								BOP1
WDR36	LSP1	DDX24								DDX3Y
PPIG	LYAR	RRP12								PRPF19
DDX1	MATR3	HNRNPUL2								FCF1
TRA2A	MBNL1	SRSF2								CCDC137
NOL7	MCM3	DNTTIP2								BAZ2A
HDAC1	MCM5	SNRPE								WDR43
HDAC2	MCM6	NVL								HNRNPAB
WDR74	METAP2	NOL7								TOP2A
DKFZp686F2281	MKI67	NHP2								SYNCRIP
MTA2	MOV10	CENPV								TRA2A
GNL3L	MRPS7	RBMX								WDR75
HNRNPA0	MS4A1	CBX3								STRBP
BAZ1B	MTDH	MRTO4								EFTUD2
RBM25	MTHFD1	LLPH								PPP1CB
DDX24	MTHFD1L	PCBP1								KRR1
C9orf114	MX1	SMARCA5								UTP6
KIF23	MYBBP1A	VIM								RRP9
RRP12	MYH9	RBM8A								HSPA8
NOL11	MYL12A	HNRNPA3								NGDN
WDR3	MYO1E	ELAVL1								DCAF13
HSPA4	MYO1G	EBNA1BP2								MAK16
TOP2A	MYO5A	SNRPD3								DDX54
PPP1CB	MYO6	DDX52								TARDBP
MED19	MYO9B	NOP16								DDX21
UHRF1	NAP1L4	RBM39								NOC3L
KCNK1	NAT10	IMP3								NSA2
KRI1	NCL	HNRNPK								SURF6
TTF1	NIFK	PCBP2								DDX24
PLRG1	NKRF	RRS1								RRP12
DEK	NOC4L	NOL11								HNRNPUL2
DKFZp434D199	NOL6	CEBPZ								SRSF2
SNRNP40	NONO	ISG20L2								DNTTIP2
AP2M1	NOP2	RPF1								SNRPE
CCT3	NOP58	SNRNP40								NOL7
POP1	NPM1	PPIA								NVL
SRSF5	NPM3	HNRNPH2								NHP2
BAZ2A	NSUN5	KPNB1								CENPV
ISG20L2	NUFIP2	AATF								RBMX
RBM12B	NUP133	FTSJ3								LLPH
DCAF13	NUP153	SRSF5								MRTO4
SLC25A5	NUP155	ERH								CBX3
SRPK1	NUP160	RRP1B								PCBP1
GNB1	NUP205	RRP15								SMARCA5
GNB2	NUP210	RSL1D1								VIM
MKI67	NUP214	UTP23								RBM8A
PRPF40A	NUP98	HNRNPL								HNRNPA3
FUS	OAS3	HNRNPU								ELAVL1
ACIN1	PA2G4	KRI1								EBNA1BP2
CDC5L	PABPC1	SRSF3								SNRPD3
MMTAG2	PABPC4	DDX56								DDX52
IGF2BP1	PDCD11	RBM28								NOP16
NCOA5	PEG10	HNRNPA1								RBM39
NKAPL	PFKL	CTCF								IMP3
NKAP	PFKP	NOL10								HNRNPK
NOC3L	PHGDH	UTP15								PCBP2
NPM3	PIP4K2A	SRSF4								RRS1
bK150C2.9	PIP5K1A	RBMXL1								NOL11
APOBEC3D	PLCG2	VDAC2								CEBPZ
APOBEC3B	PLD1	GAR1								ISG20L2
GTPBP4	PLEC	RPF2								RPF1
U2AF1	PLRG1	HNRNPC								SNRNP40
EBNA1BP2	PNO1	GNL2								PPIA
YBX3	PNPT1	PES1								HNRNPH2
TCOF1	POLD1	PPAN								KPNB1
DDX27	POLDIP3	CHTOP								AATF
CDYL2	POLR1A	CDCA8								FTSJ3
H2AFX	POLR2A	H2BC4								SRSF5
HIST1H2AB	POLR2B	UTP20								ERH
HIST3H2A	POM121C	RAE1								RRP1B
HIST2H2AC	POP1	H2AZ2								RRP15
HIST2H2AA3	PPP1CC	H2BC12								RSL1D1
HIST1H2AD	PRDX5	SLC25A3								UTP23
HIST1H2AH	PRIC295	RPS18								HNRNPL
HIST1H2AJ	PRKDC	FAM207A								KRI1
H2AFJ	PRKRA	UTP4								HNRNPU
HIST1H2AG	PRMT1	NIP7								SRSF3
HIST1H2AC	PRMT5	UBB								DDX56
PRPF4B	PRPF3	RPLP0								RBM28
EIF3D	PRPF31	H2AZ1								HNRNPA1
TSR1	PRPF4	RPL36								CTCF
HNRNPL	PRPF8	LMNB1								NOL10
ZNF512	PRRC2A	RACK1								UTP15
RCC2	PSMD2	RPL36A								SRSF4
MBD2	PSMD3	CMSS1								RBMXL1
SERBP1	PSPC1	UTF1								VDAC2
PAK1IP1	PTBP1	GNAI2								GAR1
SRP14	PUM1	PUM3								RPF2
DDX39A	PWP1	H2BU1								HNRNPC
RBM14	PWP2	D1PAS1								GNL2
TARDBP	PYCR1	RPL29								PES1
MATR3	RAB7A	LMNB2								PPAN
EIF2S3L	RANBP2	RPS20								CHTOP
EIF2S3	RASAL3	RPL35								CDCA8
DDX50	RAVER1	RPL21								RPS11
PRKDC	RBBP6	RPS23								RPS17
DDX17	RBM10	H2BC1								RPL10A
SKIV2L2	RBM14	NUP93								RPL26
STRBP	RBM15	H2AW								NUP155
PRPF8	RBM27	H1-6								NUP98
DDX23	RBM4	SLC25A4								NIFK
ASNS	RBM5	RPL7L1								RPS5
YWHAE	RNASEH1	HIST2H2BB								RPL7A
NHP2	RNASEH2B	RPS15A								RPS6
CCT6A	RNASEH2C	UTP3								RPS10
DKFZp781B11202	RNF213	HIST3H2BA								KPNA2
DARS	ROD1	H2BC21								BCLAF1
PINX1	RPL10A	RPL15								RPL5
DHX36	RPL12	HNRNPDL								NUP160
MFAP1	RPL13	C1ORF13								RPS3A
DNTTIP2	RPL13A	SAP18								RPL12
YBX3	RPL17	NOP9								RPS12
HNRNPK	RPL23A	YWHAQ								RPS4X
VIM	RPL24	H1-1								RPS3
PRPF3	RPL26	NOP53								RPL3
SRSF9	RPL3	RPLP1								POLDIP3
RAI1	RPL4	RPL34								CHD4
ZCCHC17	RPL5	SSB								RPS19
VDAC2	RPL7	RPL28								RPL9
STAU1	RPL7A	RPL18A								RPL4
CDCA8	RPL9	DNMT3B								RPL13
NUMA1	RPRD2	MYEF2								PPP1CC
TRA2B	RPS10	H3C2								RPS2
PSIP1	RPS11	SF3B1								RPL7
SRP9	RPS12	RPS27A								RPL13A
TARBP2	RPS14	H2AX								RPS7
PARP1	RPS15	TRIP12								NUP133
NAT10	RPS17	SNRPA								PNO1
CEBPZ	RPS19	ACTC1								RPL23A
GNL3	RPS2	H2BC7								RPS25
SP110	RPS24	MACROH2A1								RPL17
SRSF10	RPS25	GLYR1								KHDRBS1
CBX8	RPS3	RPL18								GAPDH
ZNF668	RPS3A	RPL32								RPS14
KMT2A	RPS4X	NOP14								RPS24
CMAS	RPS5	SNU13								RPL24
CDYL	RPS6	RPL27A								DIMT1
CENPV	RPS7	KHSRP								CSNK2A1
ADARB1	RPS9	RPS13								RPS9
ADAR	RTCB	RPSA								RPS15
HCA90	SAMD9	RBM19
TPX2	SART3	H2AC11
MYO1C	SCYL2	TRIM28
PSMC3	SF1	UTP11
APOBEC3C	SF3A1	RPS8
PRPF4	SFPQ	TUBA1B
SNRPF	SFXN1	SSR1
HNRNPF	SKIV2L	RPS19BP1
NXF1	SKIV2L2	NUP107
HNRNPA2B1	SLC25A12	DDX10
INCENP	SLC25A6	ATP5F1C
SNRPG	SLIRP	YWHAZ
COIL	SMAP2	H3C1
SF3B14	SMARCA4	RPL10
MND1	SMC1A	ACTB
SFPQ	SMC6	RPL23
NOL10	SNC73	H1-3
BRD7	SND1	FYTTD1
HSPA1A	SNRNP200	PSMD1
BRD9	SNRP70	ACTG2
MKI67	SNRPD1	RRP36
SRRM1	SNRPD2	NOL9
SRSF4	SNW1	H1-5
PLEC	SON	SLC25A13
ZNF800	SRP14	RPL35A
NVL	SRP68	PHB2
SND1	SRPK1	C1QBP
DDX52	SRSF1	H2BC9
SART1	STAU1	RPN1
DHX30	STRAP	RPL37A
USP10	SUPT16H	CANX
ZNF280C	SUPT5H	RPL22
PWP2	TAF15	H3-5
CBX3	TBL3	RPS26
FBXO31	TCOF1	RPL11
IGF2BP3	TCP1	RPL8
SNIP1	TFG	CBX1
G3BP2	TNIK	ATP5PO
NOL12	TNRC6B	ACTA1
ABCF1	TRA1	NOC2L
DDX47	TRAF1	C11ORF98
TAF15	TRIM25	RPL31
CLIC4	TRIP4	ACTA2
HNRNPD	TRMT2A	ALB
DDX6	TSR1	H2BC14
PARP2	TTC37	VDAC1
RDX	TWISTNB	ESRRB
MSN	U2AF1	PHB
EZR	U2AF2	DPPA4
HNRNPA3	U5-116KD	SEC61B
ZNF593	UBAP2L	LIN28A
NCL	UBE1	RPL6
RBBP6	UPF1	TOMM22
HEATR1	UPF3B	RPL30
KIAA0020	USP10	PNN
NPM1	UTP14A	ACTG1
SRSF11	WARS	RPLP2
C14orf166	WDR3	H2BC3
CCDC59	WDR36	RPL27
SCAF1	WDR6	ABT1
ZC3HAV1	WIBG	RPS16
SMARCA2	XRN1	RPL14
SMARCA4	XRN2	RPL37
REXO4	YBX1	H4C1
FRG1	YTHDC2	H1-4
MAP4	YTHDF2	SLC2A1
RAB7A	YTHDF3	METAP1
SRSF6	ZC3H11A	H1-2
PCNA	ZC3H15	HSP90AA1
UTP6	ZC3HAV1	DPPA2
LARP1	ZFR	PPP1CA
PCBP1	ZNF598	YWHAB
CRNKL1
RSBN1
VARS
SENP3
RUVBL2
RSL24D1
SNRNP70
DNMT1
RTCB
C22orf28
TOP1
CHTOP
GNB2L1
CDC40
SUPT16H
RBM22
PTPRC
NRAS
KRAS
HRAS
NUCKS1
RRP9
LUC7L3
GNAI3
U2AF2
KPNB1
SNW1
FIP1L1
CCT2
PCBP3
PCBP2
TCOF1
HSP90AB2P
ZC3H11A
DDX46
SRPK2
CCT4
RBMX2
DKFZp313K0921
G3BP1
SNRPC
DDB1
SRSF7
EIF4A1
EIF4A2
ZMYND11
SART3
RAC1
RAC2
RAC3
BUB3
EIF2S1
SFRS3
SRSF3
EPPK1
HNRPLL
HNRNPLL
FAM98A
ARGLU1
XAB2
EEF1G
MCM5
RARS
HIS1H2BA
H2BFS
HIST1H2BC
HIST2H2BF
HIST1H2BM
HIST1H2BK
HIST1H2BD
HIST1H2BH
HIST1H2BN
HIST1H2BL
ZNF207
PRDX6
WDR55
RBBP7
RBBP4
RBM28
AATF
RRP1
AKAP17A
HSPA8
MYH9
PHGDH
EEF2
PSME1
RBM39
LARS
PGK1
CENPC1
SFRS2
SRSF2
RRP8
HIST2H3A
TCP1
EIF5AL1
EIF5A2
EIF5A
EIF5B
PRPS1L1
PRPS2
PRPS1
CORO1A
PKM
PKM2
STRAP
NOP10
PAPD5
ZC3H15
NGDN
IMP4
PPIA
ENO1
SRSF1
RNPS1
SLTM
FKBP4
ADARB2
PES1
HSP90AB1
SUV39H1
SON
ARF3;ARF1
DDX41
NO66
DNAJA3
RAB1C
RAB15
RAB13
RAB8B
RAB1B
RAB10
RAB8A
RAB1A
ZNF616
PGAM1
PGAM2
PRDX1
CBX5
SSRP1
EMG1
PTBP1
CFL1
AURKB
THRAP3
PAFAH1B3
SRRM2
NOC4L
AKR1B1
AKR1B15
SF3B2
MCM3
EEF1A1
EEF1A1P5
NACA
LUC7L2
C7orf55
PA2G4
ALDOA
PFN1
U2SURP
CLTC
YWHAG
EIF3F
EPHB6
CWC25
SMARCA5
PPP2R1A
DPYSL5
NOLC1
EIF3I
RAP1A
RAP1B
TARS
TARSL2
HMGN2
HMGN3

## Sheet: Prox-MS RLBPs
Table S1. Proteins found to interact with R-loops
Sheet 2 - Prox-MS studies
Mosler et al.	Yan et al.		Prox-MS Training dataset		References
ERH	ADNP		SMNDC1		Mosler et al. 2021		https://pubmed.ncbi.nlm.nih.gov/34916496/
SRSF2	AHCTF1		ORC3		Yan et al. 2022		https://pubmed.ncbi.nlm.nih.gov/35013239/
DDX39B	ALKBH2		U2SURP
CTNNBL1	ALX4		VEZF1
ANP32E	ALYREF		MDC1
API5	ANKRD11		NKX2-5
TRA2B	ANP32E		DDX5
DKC1	ARID3B		HMGB3
EBNA1BP2	ARL15		RFC2
PABPN1	ARL6IP4		ANP32E
SNRPA	ARNT		CHD1
NGDN	ASH1L		NAT10
SRSF7	ASTE1		BAZ1B
RBM39	ATAD5		NOP56
SUPT16H	ATF7		PHF6
ANP32A	ATRX		ORC2
HNRNPC	AUNIP		RBM14
NCL	AURKA		RPL5
CDC5L	AURKB		ZNF148
SF3A1	BARD1		GTPBP4
DNAJC8	BAZ1A		MSH6
DDX27	BAZ1B		PRC1
TRA2A	BAZ2B		RACGAP1
HNRNPC	BBX		NPM1
WBP4	BLM		NOP2
PLRG1	BMS1		SCML2
XRCC1	BPGAP1		TOP2A
HNRNPA1L2	BRCA1		DDX18
HNRNPA1	BRD2		POGZ
DDX39A	BRD9		ZNF24
SART1	BUD31		RFC1
FAM50A	C10orf4		RBBP7
HMGB1	C11orf31		GATAD2A
HMGB1P1	C12orf43		DLX5
CSTF3	C12orf52		CWC22
RPRD1B	C19orf43		NOP14
HNRNPAB	C1orf131		HP1BP3
SF3B2	C1orf174		DDX21
DDX42	C4orf27		NOP58
SMARCE1	C7orf50		CDC73
SRSF1	CBX3		POP1
ILF2	CBX4		NKX2-4
DCPS	CC2D1A		USP48
BRD2	CCDC102A		ALYREF
RBM26	CCDC106		BAZ1A
PPP1R10	CCDC137		PHF8
PQBP1	CCNA2		ARID3B
CWC15	CDC40		DLX6
NUDT21	CDC6		TMPO
THRAP3	CDC73		NVL
HNRNPU	CDCA5		MKI67
SAE1	CDCA7L		GTF2F2
CCAR1	CDCA8		GRWD1
PRPF6	CDX2		PDCD11
SF3B1	CDYL		CBX3
HNRNPA0	CECR2		ZNF768
DDX46	CENPB		GTF2I
WBP11	CENPC		BRD2
PSME3	CENPF		PDS5A
TOP1	CENPO		HOXB9
ALYREF	CENPP		GPATCH4
MCM2	CENPU		EBNA1BP2
HP1BP3	CFDP1		CFDP1
DDX18	CGGBP1		RBM39
TERF2IP	CHAMP1		HOXA5
MFAP1	CHD1		ADNP
SFPQ	CHD2		PSIP1
MCM6	CHD6		TOP2B
HNRNPK	CHD7		DEK
CPSF1	CHEK1		BMS1
CTDSPL2	CMAS		GTF3C1
CD2BP2	CNN3		UBTF
RALY	CREB5		PHF10
SET	CREM		U2AF1
SETSIP	CWC22		UHRF1
IK	CWC25		XRCC1
FUBP1	CWF19L1		DLX1
MCM4	CXorf56		AHCTF1
GTF2I	DACH1		TRMT1L
SRSF6	DCAF13		LIG3
PRCC	DDX18		JUN
HNRNPD	DDX21		ILF3
SON	DDX31		SUPT16H
POLDIP3	DDX41		RFC4
VRK1	DDX5		DDX41
CCNK	DDX50		KNOP1
SRRT	DDX52		GTF3C2
SSRP1	DDX55		YY2
SNW1	DEK		PINX1
SNRNP70	DEPDC1		MYBBP1A
QKI	DHX36		MAZ
PRPF4	DIMT1		VRK1
NAT10	DKFZp564C172		HMGB2
SMARCA5	DKFZp666G145		DDX50
HNRNPL	DKFZp686H0575		SMARCA1
PES1	DKFZp686L1814		SF1
ZC3H4	DKFZp686L2367		HMGB1
CCDC86	DKFZp686P16143		PARP1
DHX16	DLX1		KIF23
WTAP	DLX5		TOP1
XRCC5	DLX6		FAM50A
NFYC	DVL2
PRPF39	E2F3
HMGB2	EBF3
SSB	EBNA1BP2
CBX1	ECT2
CHAF1B	EGR1
SKIV2L2	EHMT2
SF3B4	ELF2
KDM1A	ELMSAN1
RNF20	EME1
MTA1	EN2
DDX50	ERCC3
DDX41	ERCC6
MCM3	ERICH1
HIST1H2AJ	ESCO1
HIST1H2AH	EWSR1/ATF1 fusion
H2AFJ	EXO1
HIST2H2AC	EYA4
HIST1H2AC	FAM178A
HIST3H2A	FAM204A
HIST2H2AA3	FAM50A
HIST1H2AD	FAM64A
HIST1H2AG	FLI1
HIST1H2AB	FLYWCH1
H2AFV	FOXA1
H2AFZ	FOXD2
HIST1H2AA	FOXJ3
H2AFX	FOXK2
XRCC6	FOXL2
EXOSC7	GATA2
SCAF4	GATA3
ZRANB2	GATA4
HNRNPM	GATA6
SARNP	GATAD1
HNRNPA2B1	GATAD2A
RBM10	GLYR1
CHTOP	GNL2
CSTF1	GPATCH4
SNRPE	GTF2E2
RBM17	GTF2F2
CPSF6	GTF2I
KIAA0907	GTF3C1
U2AF2	GTF3C2
BCLAF1	GTF3C4
ILF3	GTPBP4
SRSF11	H1FX
RPA1	hCG_2042749
SUPT6H	hCG_20884
DDX5	hCG_96198
C17orf85	HCTP4
TKT	HEL106
CPSF7	HEL23
GTF2F1	HEY1
RBM27	HMCES
NELFA	HMGA1
ANP32B	HMGA2
DDX17	HMGB1
ZNF207	HMGB2
LUC7L	HMGB3
HIST1H2BC	HMGXB4
HIST1H2BN	HN1
HIST1H2BL	HOMEZ
HIST1H2BM	HOXA10
HIST1H2BH	HOXA3
HIST2H2BF	HOXA5
HIST1H2BD	HOXA9
H2BFS	HOXB6
HIST1H2BK	HOXB8
HIST3H2BB	HOXB9
HIST2H2BE	HOXC4
HIST1H2BB	HOXC9
HIST1H2BO	HOXD13
HIST1H2BJ	HOXD8
ZNF768	HP1BP3
SMARCA4	IKBKAP
PPIE	ILF3
RBMX	ISG20L2
C9orf78	ISL2
FIP1L1	ITGB3BP
MCM5	IWS1
KHDRBS3	JRKL
TLE3	JUN
SUPT5H	JUND
UTP3	KAT7
RBM15	KDM2A
SRSF10	KDM2B
RBM12	KDM4B
SRRM2	KIAA0649
CWC27	KIAA1958
TEX10	KIF18A
MTA2	KIF18B
STAG2	KIF22
NONO	KIF23
SNRNP200	KIFC1
DHX9	KLF10
TCERG1	KLF12
RCC1	KLF3
KIAA1429	Klf5
TCEA1	KMT2A
RRP12	KNOP1
CDC73	KPNA1
EIF4A3	KPNA3
PSPC1	KPNA6
HMGB3	L3MBTL2
HNRNPK	LCOR
PARP1	LDB1
RAD50	LEF1
STRBP	LENG1
ZC3H14	LHX4
PPP1R8	LIG3
CTBP2	LIN9
PHF6	LOC115098
TSPAN10	LRIF1
RPRD1A	LSM14B
ESF1	LTG9
CFDP1	MAP7
TRIM28	MAZ
NVL	MBD1
NELFCD	MBD4
SRSF9	MCM10
GATAD2B	MDC1
PARN	MELK
SF3A3	MEN1
GTF2F2	MGC12965
SDAD1	MKI67
SF1	MLH1
CWC22	MNX1
MIER1	MPG
SMARCC1	MRGBP
SAP30BP	MROH8
HNRNPA3	MSANTD3
HNRNPUL1	MSH6
LIG3	MSX1
XRN2	MSX2
PAPSS1	MTF2
HIRIP3	MUM1
MATR3	MUS81
CMTR1	MVB12A
DPF2	MYBBP1A
SCML2	MYC
PRPF8	MYSM1
FAM98B	NARG2
RPRD2	NAT10
PPHLN1	NFATC2IP
ADNP	NFIB
HTATSF1	NFIC
GNL3	NFIL3
HNRNPA3	NFIX
MED1	NKAP
THUMPD1	NKX2-2
NPM1	NKX2-4
RBBP6	NKX2-5
NOP2	NKX3-1
DBR1	NOL10
RFC1	NOP14
UBA2	NOP2
TCEB3	NOP56
THOC6	NOP58
CHD4	NPM1
RAVER1	NR2B1
KRR1	NR2C1
HNRNPR	NR2C2
CREB1	NSD1
U2SURP	NVL
PRPF40A	ODF2
AKAP8L	OPRM1
FAM192A	ORC1L
TPR	ORC2L
KHDRBS1	ORC3
HIST1H4A	ORC4
RBM25	ORC5L
RBM33	OTX2
CTBP1	PAPD5
RTF1	PARG
DLX5	PARP1
DLX2	PAX2
DLX6	PAX3
DLX1	Pax9
POLR2A	PC4
SART3	PDCD11
PRPF19	PDLIM7
SLC4A1AP	PDS5A
RNF40	PDX1
NRF1	PHC2
YY1;YY2	PHF10
BRD4	PHF16
SMNDC1	PHF2
EXOSC10	PHF23
PELP1	PHF6
SRSF5	PHF8
PUF60	PIAS1
DHX38	PIAS2
LUC7L3	PIAS4
FTO	PINX1
GTF2E1	POGZ
ARID1A	POP1
MPHOSPH10	POU3F1
QRICH1	PPP1CC
NKX2-5;NKX2-4;NKX2-1	PRC1
SETD1A	PRDM16
BYSL	PRDM5
SNRPN;SNRPB	PRRX1
KHSRP	PSIP1
CHERP	RACGAP1
C1orf52	RAD54B
RECQL	RAP80
LMNB1	RBBP5
HNRNPDL	RBBP7
HDAC2	RBM14
DHX8	RBM20
PPIL4	RBM28
PPWD1	RBM39
CCAR2	RBPJ
ZC3H13	REV3L
GGH	REXO4
HELLS	RFC1
SFSWAP	RFC2
RBBP4	RFC4
ZNF148	RFX5
MSH6	RFXAP
DHX15	RMI1
S100A8	RNF168
DHX37	RNF169
USP39	RP9
LUC7L2	RPL24
AQR	RPL5
ALKBH5	RPL7A
PBX1	RPP38
IRF2BP1	RPS3A
APEX1	RRP15
SRSF3	SAV1
HNRNPUL2	SBNO1
PHF10	SCMH1
PTBP2	SCML2
MYBBP1A	SCRIB
SNRPB2	SEC63
HNRNPH1	SETX
WDHD1	SF1
GTF3C5	SGOL2
TOX4	SHPRH
RBM22	SIX1
SRSF4	SIX4
ACTL6A	SLC25A6
PPM1G	SMARCA1
POGZ	SMARCAD1
BUB3	SMARCAL1
THOC5	SMNDC1
EYA3	SP2
CBX5	SPIN
ZFR	SRBD1
CUX1	SRPK1
LARP7	SRPK2
CTCF	STAU2
SPEN	SUHW4
GATAD2A	SUPT16H
ZNF638	TAF3
NCOR1	TBX1
ARID1B	TCEANC2
TFIP11	TCF12
FUS	TDP2
SUGP1	TDRP
PAXBP1	TFAP2A
NFYA	TFAP4
SLTM	TFCP2
GPKOW	TGIF2
MED12	THYN1
DDX21	TICRR
ASUN	TMA16
NOP56	TMPO
NCAPH2	TOP1
PDS5A	TOP2A
SP1	TOP2B
FKBP5	TOP3A
ORC2	TRIP12
RPL13	TRMT10C
DIS3	TRMT1L
MCM7	TUBA4A
HDGF	TWISTNB
KDM3B	U2AF1
RANBP3	U2SURP
ARID3B	UBN2
HNRNPH3	UBTF
HNRNPF	UHRF1
GPATCH4	USP1
CXorf57	USP36
PHF8	USP48
PHAX	UTP11L
TARDBP	UTP18
AATF	VEZF1
PTBP1	VRK1
YLPM1	WDR25
KRI1	WHSC1
RCC2	WHSC1L1
ILKAP	WIZ
BMS1	XPC
NUMA1	XRCC1
BAZ1B	YAP1
CDK9	YTHDF1
USP7	YY2
TRMT6	ZBED4
RNF2	ZBED5
NELFE	ZBTB10
FOXK1	ZBTB33
EWSR1	ZBTB41
GABPA	ZBTB7A
FANCI	ZBTB8A
TAF15	ZBTB9
WDR36	ZFHX1B
DNMT1	ZFHX4
SCAF11	ZFP37
SIRT1	ZFP64
FANCD2	ZFX
BOD1L1	ZKSCAN4
PRPF31	ZMYND11
SMARCA1	ZNF121
FOXC1	ZNF148
MSH2	ZNF189
QSER1	ZNF217
NKRF	ZNF24
PDCD11	ZNF250
ZNF326	ZNF280C
DDX51	ZNF281
NOP14	ZNF292
PBRM1	ZNF3
NASP	ZNF35
DIDO1	ZNF362
RBM8A	ZNF384
KNOP1	ZNF451
NXF1	ZNF48
TRMT1	ZNF512B
HNRNPDL	ZNF518B
NOSIP	ZNF629
ORC3	ZNF644
HLTF	ZNF652
PPP4C	ZNF691
MBNL1	ZNF740
ELAVL1	ZNF746
PRC1	ZNF768
IRF2BP2	ZSCAN25
RBM5	ZSCAN29
UBTF
DDX24
ZNF346
POLA1
ADAR
CREBBP
BAZ1A
ISY1
PINX1
RFX1
WAPAL
BAZ2A
KIF4A
LMNB2
NCBP1
UTP14A
DDX54
NCOA5
THOC2
NSUN2
HEXIM1
TCOF1
THOC1
ACIN1
SUGP2
FEN1
DGCR14
UBR5
HOXA5
INTS1
TCEAL4
HAT1
TRIM33
HNRNPH2
UTP20
ZNF318
TLK2
ZMYM4
PRIM2
PUS7
NOC3L
SMARCC2
NOP58
TRIM24
POP1
CDKN2AIP
RACGAP1
CSTF2
RNF113A
RBM14
ASH2L
NIPBL
DEK
SIN3A
BTAF1
GTF3C2
NOL9
TOP2B
AHCTF1
TRMT1L
RRP1
WRNIP1
USP48
CHD1
RBM6
POLR3F
PCF11
CHD8
SYMPK
SAFB
GTF3C1
MRE11A
SUMO2
RIF1
CEBPZ
COIL
TSR1
ZCCHC8
WDR43
CBX3
ZNF24
WAC
XPO5
RPL4
RCOR1
EFTUD2
RNMT
RBBP7
PSIP1
SAMHD1
TOP2A
MECP2
ELAC2
FNBP4
MDC1
HCFC1
LMNA
UHRF1
BCOR
AKAP8
LAS1L
DNTTIP2
FKBP10
ZC3H11A
HOXB9
RPL5
NCAPD3
JUN
INCENP
TP53BP1
TRRAP
TPX2
MMTAG2
RAD54L2
TCF20
PRKDC
UGDH
NUP153
BCAS2
ZNF503
RPA2
POLE
TRUB1
SMC3
SLU7
PDCD4
DAZAP1
GCFC2
CDK12
GTPBP4
TMPO
NOL8
MED13
GMPS
RBM4B
MDN1
BCCIP
HEATR1
CD63;SS18
CELF1
MKI67
UBA3
DCUN1D5
SF3B3
POLR1A
BPTF
DFFA
DNAJC9
TMPO
UBLCP1
PRMT1
POLD1
MCMBP
NOL11
POLR3A
MAT2A
CUL3
PUS1
URB1
NTHL1
PPP1CA
CPSF3
PTGS2
RRP1B
RAN
PML
USP28
DUT
DDB1
CASP14
NT5DC1
RFC4
POLR2B
RNASEH2A
SMCHD1
RTFDC1
GRWD1
CSE1L
APIP
KIF23
CWF19L2
WDR61
FAM208A
RFC2
SMC1A
PPIH
HMBS
RPL11
NUP50
CUL4B
NUB1
DCAF7
UBA1
NNT
NANS
NKX2-5
NKX2-4
NKX2-1
H3F3B
H3F3A
HIST2H3PS2
H3F3C
HIST2H3A
HIST3H3
HIST1H3A
MAZ
VEZF1
PATZ1
SMARCD1
SMARCD3
SMARCD2
U2AF1
U2AF1L4
PAPOLA
PAPOLB
POM121C
POM121
RBFOX2
RBFOX1
RBFOX3
PCYT1A
PCYT1B

## Sheet: Intersect of all RLBP datasets
Table S1. Proteins found to interact with R-loops
Sheet 3 - Intersect of published RLBP datasets
Cristini x Wang x Wu x Mosler x Yan
DDX5
NAT10
NPM1
NOP2
DDX18
NOP58
ALYREF
U2AF1
ILF3
RBM14
PDCD11
MYBBP1A

## Sheet: PFAM domain enrichment
IP-MS RLBPs
Term	Count	%	PValue	Genes	Pop Hits	Fold Enrichment	Bonferroni	Benjamini	FDR
PF00076:RNA recognition motif. (a.k.a. RRM, RBD, or RNP domain)	53	18.4028	3.73673e-48	RBM28, ELAVL1, RBM4, PTBP1, SYNCRIP, SART3, SNRNP70, RBM14, RBM15, PABPC4, SFPQ, RBMXL1, HNRNPH1, NCL, SRSF2, SRSF3, SRSF4, HNRNPH2, SRSF5, PABPC1, SRSF6, SRSF7, RBM8A, POLDIP3, SRSF1, U2AF1, U2AF2, TRA2B, G3BP1, TRA2A, IGF2BP1, G3BP2, RALY, IGF2BP3, HNRNPA1, SRSF10, HNRNPA0, RBM39, HNRNPA3, TAF15, NIFK, FUS, ALYREF, NONO, HNRNPAB, HNRNPL, HNRNPM, HNRNPF, HNRNPA2B1, HNRNPD, HNRNPC, TARDBP, RBMX	215	16.3643	1.0986e-45	1.0986e-45	1.05002e-45
PF00270:DEAD/DEAH box helicase	20	6.94444	2.75789e-19	DDX3Y, DDX17, EIF4A1, DDX18, DDX6, DDX5, DDX27, DDX3X, DDX24, DHX9, DDX1, DDX23, DDX56, DDX21, DDX54, DDX52, DHX30, DHX36, DHX15, SNRNP200	69	19.2416	8.10819e-17	4.0541e-17	3.87483e-17
PF00271:Helicase conserved C-terminal domain	23	7.98611	5.92126e-19	DDX3Y, DDX17, EIF4A1, DDX18, DDX6, DDX5, DDX27, DDX3X, DDX24, DHX9, DDX1, DDX23, DDX56, SMARCA5, DDX21, DDX54, CHD4, DDX52, SMARCA4, DHX30, DHX36, DHX15, SNRNP200	109	14.0075	1.74085e-16	5.80283e-17	5.54624e-17
PF00400:WD domain, G-beta repeat	18	6.25	8.57943e-08	UTP15, WDR36, WDR3, WDR74, WDR75, PLRG1, PRPF19, PWP2, PWP1, UTP18, WDR43, RRP9, PRPF4, BOP1, SNRNP40, TBL3, STRAP, DCAF13	232	5.15044	2.52232e-05	6.30588e-06	6.02705e-06
PF04427:Brix domain	5	1.73611	7.27779e-07	PPAN, BRIX1, IMP4, RPF2, RPF1	6	55.3196	0.000213944	4.27934e-05	4.09012e-05
PF00013:KH domain	7	2.43056	1.70373e-05	FXR1, KHDRBS1, HNRNPK, PCBP1, PCBP2, IGF2BP1, IGF2BP3	37	12.559	0.0049965	0.00083483	0.000797916
PF07528:DZF domain	4	1.38889	3.27179e-05	ILF3, STRBP, ZFR, ILF2	5	53.1068	0.00957311	0.00137415	0.00131339
PF00118:TCP-1/cpn60 chaperonin family	5	1.73611	7.84183e-05	CCT3, CCT2, TCP1, CCT8, CCT4	16	20.7448	0.0227921	0.00288187	0.00275444
Prox-MS RLBPs
Term	Count	%	PValue	Genes	Pop Hits	Fold Enrichment	Bonferroni	Benjamini	FDR
PF09011:HMG-box domain	4	3.9604	1.62718e-05	HMGB2, UBTF, HMGB3, HMGB1	10	75.5959	0.00225925	0.00160888	0.00153943
PF00271:Helicase conserved C-terminal domain	7	6.93069	2.31493e-05	DDX18, DDX5, DDX21, DDX41, SMARCA1, DDX50, CHD1	109	12.137	0.00321262	0.00160888	0.00153943
PF00046:Homeobox domain	8	7.92079	0.000185909	DLX1, HOXB9, DLX5, DLX6, ADNP, NKX2-5, NKX2-4, HOXA5	226	6.6899	0.0255127	0.00732341	0.00700729
PF00628:PHD-finger	5	4.9505	0.000210746	PHF10, UHRF1, BAZ1A, BAZ1B, PHF8	56	16.8741	0.0288717	0.00732341	0.00700729
